# Supplementary material for: The bacterial communities of Alaskan mosses and their contributions to N2-fixation
Source: Microbiome. 2021 Feb 23;9:53. doi: 10.1186/s40168-021-01001-4 (PMC7903681; doi:10.1186/s40168-021-01001-4)
Supplement: Supplementary file 3 — Additional file 2: Table S2. A list of all of the moss species sampled and where and how many samples were collected for each. The species sampled include 26 moss species. [file 40168_2021_1001_MOESM3_ESM.xlsx]

## Sheet: S01_table-sample_counts_per_sit
		Anchorage										Fairbanks										Toolik
Moss Species	Total Number of Samples	Site 15	Site 16	Site 17	Site 18	Site 19	Site 20	Site 21	Site 22	Site 23	Site 24	Site 1	Site 2	Site 3	Site 4	Site 5	Site 6	Site 7	Site 8	Site 9	Site 10	Site 11	Site 12	Site 13	Site 14
Hylocomium splendens	87	3	5	5	6	6	-	6	6	6	6	-	3	6	5	3	-	3	1	2	3	3	3	3	3
Pleurozium schreberi	80	6	6	6	5	6	-	6	6	6	6	-	4	5	2	4	-	-	3	3	3	-	2	1	-
Aulacomnium palustre	47	5	6	-	-	1	6	4	3	3	2	-	-	1	-	2	3	2	3	-	4	-	1	1	-
Ptilium crista-castrensis	36	-	5	5	3	3	-	3	3	-	3	3	3	3	-	-	-	-	-	-	1	-	-	1	-
Polytrichum commune	27	-	3	1	3	1	-	3	3	3	-	-	3	2	-	-	-	-	1	2	2	-	-	-	-
Polytrichum strictum	22	-	-	1	-	-	-	2	-	3	3	-	1	1	-	-	1	-	1	-	-	5	-	-	4
Dicranum polysetum	19	-	1	3	1	-	-	2	1	2	3	-	-	2	2	-	-	-	-	1	-	1	-	-	-
Sphagnum russowii	18	1	-	-	-	-	-	-	-	-	-	-	-	-	-	1	2	3	2	-	2	2	-	3	2
Aulacomnium turgidum	16	-	-	-	-	-	-	-	-	-	-	-	-	-	-	2	-	-	3	-	1	2	2	3	3
Dicranum acutifolium	12	-	-	-	-	-	-	-	-	1	-	2	2	1	-	-	-	1	-	2	-	2	-	1	-
Sphagnum angustifolium	10	2	-	-	-	-	-	-	-	-	-	-	-	-	-	3	5	-	-	-	-	-	-	-	-
Sphagnum girgensohnii	10	-	-	-	-	-	-	-	-	-	-	-	2	3	-	-	-	-	2	-	3	-	-	-	-
Rhytidium rugosum	9	-	-	-	-	-	-	-	-	-	-	-	-	-	-	-	-	-	-	-	-	3	3	3	-
Sphagnum magellanicum	9	3	-	-	-	-	-	-	-	-	-	-	-	-	-	6	-	-	-	-	-	-	-	-	-
Dicranum scoparium	8	-	-	-	-	-	-	-	-	1	-	-	1	-	-	-	-	-	-	-	-	2	2	1	1
Tomentypnum nitens	8	-	-	-	-	-	-	-	-	-	-	-	-	-	-	2	-	3	-	-	-	-	-	-	3
Dicranum elongatum	7	-	-	-	-	-	-	-	-	-	-	-	-	-	-	-	-	-	1	-	-	3	-	1	2
Dicranum undulatum	7	-	-	-	-	-	-	-	-	-	-	-	-	-	2	2	-	-	-	3	-	-	-	-	-
Sphagnum fuscum	6	2	-	-	-	-	-	-	-	-	-	-	-	-	-	4	-	-	-	-	-	-	-	-	-
Dicranum fragilifolium	5	-	-	-	-	-	-	-	-	-	-	-	-	-	2	-	-	-	-	3	-	-	-	-	-
Dicranum fuscescens	5	-	-	-	1	3	-	-	1	-	-	-	-	-	-	-	-	-	-	-	-	-	-	-	-
Racomitrium lanuginosum	4	-	-	-	-	-	-	-	-	-	-	-	-	-	-	-	-	-	-	-	-	-	-	1	3
Sphagnum squarrosum	4	-	-	-	-	-	-	-	-	-	-	-	-	-	-	2	2	-	-	-	-	-	-	-	-
Niphotrichum canescens	3	-	-	-	-	-	-	-	-	-	-	-	-	-	-	-	-	-	-	-	-	-	3	-	-
Hypnum lindbergii	1	-	-	-	-	-	-	-	-	-	-	-	-	-	1	-	-	-	-	-	-	-	-	-	-
Sphagnum fimbriatum	1	1	-	-	-	-	-	-	-	-	-	-	-	-	-	-	-	-	-	-	-	-	-	-	-
