# Supplementary material for: The bacterial communities of Alaskan mosses and their contributions to N2-fixation
Source: Microbiome. 2021 Feb 23;9:53. doi: 10.1186/s40168-021-01001-4 (PMC7903681; doi:10.1186/s40168-021-01001-4)
Supplement: Supplementary file 4 — Additional file 3: Table S4. Summary of the evidence for N2-fixation for each of the 22 phylotypes positively correlated with N2-fixation rate. [file 40168_2021_1001_MOESM4_ESM.xlsx]

## Sheet: Sheet1
Phylotype	Phylotype Taxonomy	Evidence for N-fixation?	Evidence Type	Details of evidence	Closest Isolate (within 90%)	Closest isolate similarity score (RDP)	Closest MAG (IMG bin ID)	Closest MAG distance (USEARCH global)	MAG Percent Completeness	MAG Percent Contamination	IMG nifH gene ID	IMG 16S SSU gene ID	Citation (if applicable)
OTU_17	k__Bacteria;p__Proteobacteria;c__Betaproteobacteria;o__Burkholderiales;f__;g__;s__	no			Derxia gummosa; IAM 14990; AB089481	0.968	IMG_3300028572_4	0.929
OTU_20	k__Bacteria;p__WPS-2;c__;o__;f__;g__;s__	no			None	NA
OTU_30	k__Bacteria;p__WPS-2;c__;o__;f__;g__;s__	no			None	NA	IMG_3300030518_18	1
OTU_33	k__Bacteria;p__Proteobacteria;c__Gammaproteobacteria;o__Xanthomonadales;f__Sinobacteraceae;g__;s__	no			Pseudomonas sp. VM15C; AB819482	0.949	IMG_3300027860_14	0.989	90.36	3.93	Ga0209611_100143849	Ga0209611_100000331
OTU_35	k__Bacteria;p__Cyanobacteria;c__Nostocophycideae;o__Nostocales;f__Nostocaceae;g__Nostoc;s__	yes	Literature	Characteristic of clade	Nostoc sp. 'Nephroma arcticum UK48 cyanobiont'; KF359685	1	None	NA					Bergey’s Manual ed. 2, vol 1. Archaea and Deeply-Branching phototrophic Bacteria, “Cyanobacteria”, Castenholz pp. 562-563
OTU_42	k__Bacteria;p__Proteobacteria;c__Alphaproteobacteria;o__Rhizobiales;f__Bradyrhizobiaceae;g__Bradyrhizobium;s__	yes	Isolate genome	Isolate genomes of the three type strains with 100% similarity scores all contain nif-gene clusters	Bradyrhizobium sp. ISLU65; AJ558029	1	None	NA					“Whole-Genome Sequences of 14 Strains of Bradyrhizobium canariense and 1 Strain of Bradyrhizobium japonicum Isolated from Lupinus spp. in Algeria”, Djamel Chekireb, Julien Crovadore, Andreas Brachmann, Romain Chablais, Bastien Cochard, François Lefort, Genome Announcements Jul 2017, 5 (29) e00676-17; DOI: 10.1128/genomeA.00676-17
OTU_46	k__Bacteria;p__Cyanobacteria;c__Nostocophycideae;o__Nostocales;f__Nostocaceae;g__Nostoc;s__	yes	Literature	Characteristic of clade	Nostoc sp. 'Nephroma arcticum UK103 cyanobiont'; KF359688	1	None	NA					Bergey’s Manual ed. 2, vol 1. Archaea and Deeply-Branching phototrophic Bacteria, “Cyanobacteria”, Castenholz pp. 562-563
OTU_47	k__Bacteria;p__Proteobacteria;c__Betaproteobacteria;o__Burkholderiales;f__Comamonadaceae;g__Methylibium;s__	yes	Metagenome	nifH present in metagenomes	2644303475 isolate img	0.996	IMG_3300011969_2/3300025650_9	0.972/0.976	99.14/50.51	0.5/4.52	/Ga0209385_10011536	Ga0120166_10001057/Ga0209385_100042315
OTU_50	k__Bacteria; p__Actinobacteria; c__Actinobacteria; o__Actinomycetales; f__Frankiaceae; g__; s__	no			Jatrophihabitans endophyticus (T); S9-650; JQ346802	0.988	None	<0.9
OTU_56	k__Bacteria;p__WPS-2;c__;o__;f__;g__;s__	no			None	NA
OTU_62	k__Bacteria;p__Proteobacteria;c__Alphaproteobacteria;o__Caulobacterales;f__Caulobacteraceae;g__;s__	no			Caulobacter sp. P-7Y; AB979861	0.98	IMG_3300028854_4	<0.9
OTU_68	k__Bacteria; p__Proteobacteria; c__Alphaproteobacteria; o__Sphingomonadales; f__Sphingomonadaceae; g__Sphingomonas; s__	no			Sphingomonas oligophenolica (T); S213; AB018439	1	None	<0.9
OTU_81	k__Bacteria;p__Proteobacteria;c__Alphaproteobacteria;o__Sphingomonadales;f__Sphingomonadaceae;g__Zymomonas;s__	no			Sandarakinorhabdus sp. JJ2202; JX304656	0.972	IMG_3300028854_4	<0.9
OTU_91	k__Bacteria;p__Acidobacteria;c__Solibacteres;o__Solibacterales;f__Solibacteraceae;g__;s__	no			Acidobacteria bacterium KBS 96; FJ870384	0.96	IMG_3300024240_6	92.1
OTU_93	k__Bacteria;p__Proteobacteria;c__Alphaproteobacteria;o__Rhodospirillales;f__Acetobacteraceae;g__;s__	no			Acetobacteraceae bacterium PN-29; AM162404	0.937	IMG_3300028854_4	<0.9
OTU_94	k__Bacteria;p__Proteobacteria;c__Alphaproteobacteria;o__Sphingomonadales;f__Sphingomonadaceae;g__Sphingomonas;s__echinoides	no			Sphingomonas sp. P5-21; AB288314; Sphingomonas glacialis; PAM2c6605; KJ606799	0.988;0.988	IMG_3300028854_4	<0.9
OTU_103	k__Bacteria;p__Proteobacteria;c__Alphaproteobacteria;o__Rhizobiales;f__Methylocystaceae;g__;s__	yes	Literature	Characteristic of clade	Beijerinckia sp. Lor46; KJ016207	0.972	IMG_3300028854_4	<0.9					Bergey’s Manual ed. 2, vol 2. Proteobacteria Part C – Alpha Beta Delta and Epsilon “Methylocystaceae” Bowman, John P. pp 411-413
OTU_112	k__Bacteria;p__Actinobacteria;c__Acidimicrobiia;o__Acidimicrobiales;f__;g__;s__	no			actinobacterium BGR 72; GU167995	0.937	IMG_3300025627_10	0.906
OTU_118	k__Bacteria; p__Gemmatimonadetes; c__Gemmatimonadetes; o__; f__; g__; s__	no			bacterium Ellin5220; AY234571	0.925	None	<0.9
OTU_129	k__Bacteria;p__Proteobacteria;c__Alphaproteobacteria;o__Rhodospirillales;f__Acetobacteraceae;g__Acidisoma;s__	yes	Literature	Nearest isolate capable of growth on nitrogen-free media	Acidisoma sp. C4; HF568986; Acidisoma sibiricum; TPB621:AM947654	0.984;0.98	None	NA					“Acidisoma tundrae gen. nov., sp. nov. and Acidisoma sibiricum sp. nov., two acidophilic, psychrotolerant members of the Alphaproteobacteria from acidic northern wetlands”, Svetlana E. Belova, Timofei A. Pankratov, Ekaterina N. Detkova, Elena N. Kaparullina, Svetlana N. Dedysh, Int J Syst Evol Microbiol, Sept 2009, 59 (9) 2283-90. DOI: 10.1099/ijs.0.009209-0.
OTU_134	k__Bacteria;p__Acidobacteria;c__Acidobacteriia;o__Acidobacteriales;f__Acidobacteriaceae;g__;s__	no			Acidobacteriaceae bacterium KBS89; AY587227	0.984	None	NA
OTU_144	k__Bacteria;p__Planctomycetes;c__Planctomycetia;o__Gemmatales;f__Isosphaeraceae;g__;s__	no			bacterium Ellin5111; AY234528; bacterium Ellin6062; AY234714;Nostocoida limicola III; Ben222; AF244749	0.984;0.984;0.945	None	NA
