# Supplementary material for: The bacterial communities of Alaskan mosses and their contributions to N2-fixation
Source: Microbiome. 2021 Feb 23;9:53. doi: 10.1186/s40168-021-01001-4 (PMC7903681; doi:10.1186/s40168-021-01001-4)
Supplement: Supplementary file 5 — Additional file 4: Table S5: Relative abundances of microbial families in each host species. [file 40168_2021_1001_MOESM5_ESM.xlsx]

## Sheet: S04_table-bacterial_family_abundances
	Sig	Aulacomnium palustre	Aulacomnium turgidum	Dicranum acutifolium	Dicranum elongatum	Dicranum fragilifolium	Dicranum fuscescens	Dicranum polysetum	Dicranum scoparium	Dicranum undulatum	Hylocomium splendens	Hypnum lindbergii	Niphotrichum canescens	Pleurozium schreberi	Polytrichum commune	Polytrichum strictum	Ptilidium ciliare	Ptilium crista-castrensis	Racomitrium lanuginosum	Rhytidium rugosum	Sphagnum angustifolium	Sphagnum fimbriatum	Sphagnum fuscum	Sphagnum girgensohnii	Sphagnum magellanicum	Sphagnum russowii	Sphagnum squarrosum	Tomentypnum nitens
Proteobacteria (49.6 %)
Methylocystaceae	***	3.08	2.17	2.94	2.08	4.55	4.26	3.26	2.11	2.5	3.49	1.7	2.84	4.11	5.84	4.96	3.22	3.12	4.12	3.87	1.41	1.6	1.69	1.7	0.74	1.14	1.83	1.82
Rhodospirillaceae	***	1.87	1.18	1.69	1.16	1.06	0.93	1.21	1.28	1.23	0.85	0.1	0.75	1.06	0.99	1.34	0.83	0.94	0.63	0.65	4.62	6.11	2.26	3.76	0.93	2.93	3.7	1.75
Acetobacteraceae	***	7.85	8.45	9.25	8.51	10.56	9.72	10.5	6.27	6.51	9.78	3.6	6.88	12.84	17.36	15.06	9.08	10.82	8.84	8.51	13.88	12.78	12.63	13.02	10.26	12.88	10.92	4.95
Caulobacteraceae	***	2.76	2.92	3.06	2.66	4.93	2.78	3.1	1.66	2.92	2.54	1.47	0.76	3.1	1.35	2.11	2.94	3.3	2.54	2.45	6.59	4.94	3.32	4.26	1.82	4.98	4.05	3.17
Beijerinckiaceae	***	0.38	0.19	0.35	0.35	0.61	0.71	0.66	0.33	0.19	0.48	0.53	0.18	0.7	5.5	2.3	0.2	0.32	0.14	0.24	0.65	0.73	0.63	0.82	0.21	0.29	0.42	0.12
Comamonadaceae	***	3.98	3.13	2.32	1.04	1.75	1.15	2.01	3.23	1.57	3.33	4.3	7.45	3.76	2.64	1.5	4.65	5.07	2.53	2.15	4.48	0.97	0.29	1.72	0.3	2.65	5.65	5.06
Sphingomonadaceae	***	3.85	2.56	2.68	1.07	1.9	1.8	3.14	4.27	1.91	4.52	8.58	4.99	5.49	4.2	2.48	9.08	6.02	4.26	4.63	2.5	0.6	0.49	1.59	0.19	1.39	3.14	3.1
Sinobacteraceae	***	6.58	6.43	5.41	7.52	4.98	5.14	5.5	5.94	6.86	7.51	1.1	2.38	7.57	9.26	6.69	3.61	7.51	4.1	4.67	8.43	8.81	12.98	9.35	17.06	11.14	9.58	5.61
Acidobacteria (12.3 %)
Acidobacteriaceae	***	8.34	10.38	11.43	9.65	13.83	11.6	12.98	7.53	9.44	9.36	1.57	1.42	12.49	11.22	13.29	9.36	11.48	5.08	11.36	6.93	6.64	8.06	8.97	9.53	8.43	6.21	5.35
Actinobacteria (8.4 %)
Conexibacteraceae	***	1.78	4.38	4.94	6.13	6.71	3.3	2.82	2.69	8.01	1.48	0.3	0.33	1.82	0.96	1.85	0.71	0.78	1.1	1.79	0.26	1.03	0.92	1.08	1.91	0.82	0.18	0.6
Sphingobacteriaceae	***	3.22	3.44	3.94	2.16	4.27	4.78	4.86	2.71	2.68	3.88	5.14	1.46	4.57	4.14	3.7	2.73	4.21	1.18	5.25	2.09	4.2	0.94	4.14	1.35	2.93	2.09	2.44
Bacteroidetes (7.5 %)
Chitinophagaceae	***	3.45	3.66	2.4	2.25	2.3	3.28	2.96	4.27	3.96	4.01	9.88	11.99	2.32	1.95	1.91	5.35	3.38	5.24	4.82	2.82	1.63	1.29	1.7	1.49	2.27	4	6.29
Verrucomicrobia (7.3 %)
Chthoniobacteraceae	***	3.17	3.07	3.25	3.05	2.71	5.04	3.64	3.52	4.15	4.32	5.41	4.52	2.31	1.99	2.62	5.01	2	6.67	5.11	1.63	0.73	1.12	1.61	1.59	2.48	2.21	2.63
Unnamed Verrucomicrobia Family	***	2.96	2.05	3.13	2.33	2.61	5.62	3.25	3.45	2.19	3.17	0.03	0.8	2.38	4.24	5.33	2.62	2.75	2.27	1.92	2.1	0.17	3.33	3.19	2.78	2.73	2.04	2.07
Candidatus Eremiobacterota (5.1 %) (WPS-2)
Unnamed WPS-2 Family	***	4.04	5.64	4.95	6.99	5.21	5.66	4.75	4.47	7.99	6.01	0.2	0.88	4.46	3.26	4.65	3.33	3.88	4.03	5.4	5.64	10.68	11.57	6.22	12.9	6.28	3.12	4.6
Cyanobacteria (3.5 %)
Nostocaceae	***	2.82	1.99	0.77	1.15	0.07	0.37	0.14	0.77	0.21	4	6.04	1.16	1.14	0.28	1.58	1.08	2.95	8.49	5.79	10.11	8.54	6.99	4.52	2.59	2.69	4.06	7.84
