# Supplementary material for: The bacterial communities of Alaskan mosses and their contributions to N2-fixation
Source: Microbiome. 2021 Feb 23;9:53. doi: 10.1186/s40168-021-01001-4 (PMC7903681; doi:10.1186/s40168-021-01001-4)
Supplement: Supplementary file 6 — Additional file 5: Table S9: Table summarizing the correlations between N2-fixation rate and the 22 putative N2-fixing phylotypes. We note that some phylotypes are listed more than once as they had significant positive correlations in multiple host species. [file 40168_2021_1001_MOESM6_ESM.xlsx]

## Sheet: 04_spm_significant_results
Phylotype	Phylotype Taxonomy	Moss Species	Spearman rho	FDR Adjusted P-value
OTU_17	k__Bacteria; p__Proteobacteria; c__Betaproteobacteria; o__Burkholderiales; f__; g__; s__; OTU_17	Sphagnum russowii	0.693159	0.0416323
OTU_33	k__Bacteria; p__Proteobacteria; c__Gammaproteobacteria; o__Xanthomonadales; f__Sinobacteraceae; g__; s__; OTU_33	Pleurozium schreberi	0.336356	0.0437135
OTU_30	k__Bacteria; p__WPS-2; c__; o__; f__; g__; s__; OTU_30	Pleurozium schreberi	0.394377	0.019258
OTU_62	k__Bacteria; p__Proteobacteria; c__Alphaproteobacteria; o__Caulobacterales; f__Caulobacteraceae; g__; s__; OTU_62	Aulacomnium palustre	0.602229	0.00203041
OTU_62	k__Bacteria; p__Proteobacteria; c__Alphaproteobacteria; o__Caulobacterales; f__Caulobacteraceae; g__; s__; OTU_62	Dicranum polysetum	0.669974	0.0421283
OTU_56	k__Bacteria; p__WPS-2; c__; o__; f__; g__; s__; OTU_56	Pleurozium schreberi	0.597605	1.03497e-05
OTU_56	k__Bacteria; p__WPS-2; c__; o__; f__; g__; s__; OTU_56	Ptilium crista-castrensis	0.496298	0.0421283
OTU_56	k__Bacteria; p__WPS-2; c__; o__; f__; g__; s__; OTU_56	Polytrichum strictum	0.621345	0.0437135
OTU_129	k__Bacteria; p__Proteobacteria; c__Alphaproteobacteria; o__Rhodospirillales; f__Acetobacteraceae; g__Acidisoma; s__; OTU_129	Pleurozium schreberi	0.387086	0.0218454
OTU_103	k__Bacteria; p__Proteobacteria; c__Alphaproteobacteria; o__Rhizobiales; f__Methylocystaceae; g__; s__; OTU_103	Pleurozium schreberi	0.374068	0.0263239
OTU_20	k__Bacteria; p__WPS-2; c__; o__; f__; g__; s__; OTU_20	Hylocomium splendens	0.336941	0.0347591
OTU_20	k__Bacteria; p__WPS-2; c__; o__; f__; g__; s__; OTU_20	Dicranum polysetum	0.71997	0.026264
OTU_35	k__Bacteria; p__Cyanobacteria; c__Nostocophycideae; o__Nostocales; f__Nostocaceae; g__Nostoc; s__; OTU_35	Hylocomium splendens	0.403419	0.00905864
OTU_112	k__Bacteria; p__Actinobacteria; c__Acidimicrobiia; o__Acidimicrobiales; f__; g__; s__; OTU_112	Pleurozium schreberi	0.411646	0.013478
OTU_50	k__Bacteria; p__Actinobacteria; c__Actinobacteria; o__Actinomycetales; f__Frankiaceae; g__; s__; OTU_50	Sphagnum russowii	0.737494	0.026264
OTU_94	k__Bacteria; p__Proteobacteria; c__Alphaproteobacteria; o__Sphingomonadales; f__Sphingomonadaceae; g__Sphingomonas; s__echinoides; OTU_94	Sphagnum russowii	0.754221	0.0211032
OTU_81	k__Bacteria; p__Proteobacteria; c__Alphaproteobacteria; o__Sphingomonadales; f__Sphingomonadaceae; g__Zymomonas; s__; OTU_81	Sphagnum russowii	0.678825	0.0437135
OTU_42	k__Bacteria; p__Proteobacteria; c__Alphaproteobacteria; o__Rhizobiales; f__Bradyrhizobiaceae; g__Bradyrhizobium; s__; OTU_42	Pleurozium schreberi	0.436273	0.00692478
OTU_68	k__Bacteria; p__Proteobacteria; c__Alphaproteobacteria; o__Sphingomonadales; f__Sphingomonadaceae; g__Sphingomonas; s__; OTU_68	Sphagnum russowii	0.734453	0.0263239
OTU_46	k__Bacteria; p__Cyanobacteria; c__Nostocophycideae; o__Nostocales; f__Nostocaceae; g__Nostoc; s__; OTU_46	Pleurozium schreberi	0.341689	0.0421283
OTU_46	k__Bacteria; p__Cyanobacteria; c__Nostocophycideae; o__Nostocales; f__Nostocaceae; g__Nostoc; s__; OTU_46	Ptilium crista-castrensis	0.543807	0.026264
OTU_134	k__Bacteria; p__Acidobacteria; c__Acidobacteriia; o__Acidobacteriales; f__Acidobacteriaceae; g__; s__; OTU_134	Ptilium crista-castrensis	0.526131	0.0296058
OTU_93	k__Bacteria; p__Proteobacteria; c__Alphaproteobacteria; o__Rhodospirillales; f__Acetobacteraceae; g__; s__; OTU_93	Ptilium crista-castrensis	0.490249	0.0437135
OTU_47	k__Bacteria; p__Proteobacteria; c__Betaproteobacteria; o__Burkholderiales; f__Comamonadaceae; g__Methylibium; s__; OTU_47	Sphagnum russowii	0.727103	0.0290536
OTU_91	k__Bacteria; p__Acidobacteria; c__Solibacteres; o__Solibacterales; f__Solibacteraceae; g__; s__; OTU_91	Pleurozium schreberi	0.421476	0.00971021
OTU_144	k__Bacteria; p__Planctomycetes; c__Planctomycetia; o__Gemmatales; f__Isosphaeraceae; g__; s__; OTU_144	Ptilium crista-castrensis	0.49979	0.0416323
OTU_118	k__Bacteria; p__Gemmatimonadetes; c__Gemmatimonadetes; o__; f__; g__; s__; OTU_118	Sphagnum russowii	0.743577	0.0240301
